# Supplementary material
Source: PubMed Central journal article supplement (PMC10033853)
Supplement: AET2-7-e10855-s001.pdf [file AET2-7-e10855-s001.pdf]

## Appendix 2: Final version of the checklist

|                                                                                                                                                                                                                                                                                                                                                                                                                                                                          |                          |
|--------------------------------------------------------------------------------------------------------------------------------------------------------------------------------------------------------------------------------------------------------------------------------------------------------------------------------------------------------------------------------------------------------------------------------------------------------------------------|--------------------------|
| 1. Obtains informed consent <ul style="list-style-type: none"> <li>• May not be possible in emergent cases</li> </ul>                                                                                                                                                                                                                                                                                                                                                    | <input type="checkbox"/> |
| 2. Positions patient appropriately in a supported manner <ul style="list-style-type: none"> <li>• Sitting on edge of bed and leaning forward</li> <li>• Alternatively: Lateral decubitus with operated side up</li> <li>• Alternatively: Supine or semi-recumbent</li> <li>• Alternatively: Supine oblique, as when performing procedure under CT guidance</li> </ul>                                                                                                    | <input type="checkbox"/> |
| 3. Inspects chest wall                                                                                                                                                                                                                                                                                                                                                                                                                                                   | <input type="checkbox"/> |
| 4. Using imaging (e.g., US or CT) as a guide, marks an appropriate site of entry                                                                                                                                                                                                                                                                                                                                                                                         | <input type="checkbox"/> |
| 5. Opens kit                                                                                                                                                                                                                                                                                                                                                                                                                                                             | <input type="checkbox"/> |
| 6. Washes hands                                                                                                                                                                                                                                                                                                                                                                                                                                                          | <input type="checkbox"/> |
| 7. Dons appropriate personal protective equipment                                                                                                                                                                                                                                                                                                                                                                                                                        | <input type="checkbox"/> |
| 8. Applies sterile gloves                                                                                                                                                                                                                                                                                                                                                                                                                                                | <input type="checkbox"/> |
| 9. Arranges materials appropriately, including placing internal stiffener into pigtail catheter                                                                                                                                                                                                                                                                                                                                                                          | <input type="checkbox"/> |
| 10. Preps over marked site and surrounding skin with chlorhexidine or appropriate alternative                                                                                                                                                                                                                                                                                                                                                                            | <input type="checkbox"/> |
| 11. Applies sterile drape, leaving only the procedure site exposed                                                                                                                                                                                                                                                                                                                                                                                                       | <input type="checkbox"/> |
| 12. Performs a pre-procedure time out immediately before procedure <ul style="list-style-type: none"> <li>• Including verification of patient ID, procedure, and site (including laterality) by all members of the team</li> </ul>                                                                                                                                                                                                                                       | <input type="checkbox"/> |
| 13. Confirms that the marked entry site is immediately above the lower rib bordering the selected intercostal space                                                                                                                                                                                                                                                                                                                                                      | <input type="checkbox"/> |
| 14. Injects local anesthetic (for example, lidocaine) at the entry site <ul style="list-style-type: none"> <li>• Using a 25 to 22 G needle, creates a superficial wheal</li> <li>• Then injects deeper into skin, aspirating before each injection for evidence of blood or entry into pleura</li> <li>• When pleural fluid or air is obtained, notes depth, pulls back needle slightly, and injects additional anesthetic to anesthetize the parietal pleura</li> </ul> | <input type="checkbox"/> |
| 15. After reconfirming positioning immediately above the rib, uses appropriate blade to make a superficial skin incision that is parallel to the rib <ul style="list-style-type: none"> <li>• Typically, a number 11 blade is used</li> <li>• Keeps incision superficial, enabling entry of catheter through the epidermis without causing injury to deeper structures</li> </ul>                                                                                        | <input type="checkbox"/> |

|                                                                                                                                                                                                                                                                                                                                                                                                                                                 |                          |
|-------------------------------------------------------------------------------------------------------------------------------------------------------------------------------------------------------------------------------------------------------------------------------------------------------------------------------------------------------------------------------------------------------------------------------------------------|--------------------------|
| 16. Attaches appropriately sized syringe to the hub of a large hollow-bore needle ( <i>typically, an 18G needle is used</i> ) and after reconfirming position immediately above the rib, introduces needle through the incision site <ul style="list-style-type: none"> <li>• If using real-time imaging guidance, use of a syringe may be omitted</li> </ul>                                                                                   | <input type="checkbox"/> |
| 17. While inserting needle, continuously aspirates syringe in order to immediately recognize fluid or air return from pleural space <ul style="list-style-type: none"> <li>• If using real-time imaging guidance, this step may be omitted</li> </ul>                                                                                                                                                                                           | <input type="checkbox"/> |
| 18. Removes syringe from needle hub while carefully maintaining position of needle <ul style="list-style-type: none"> <li>• If using real-time imaging guidance, use of a syringe may be omitted</li> </ul>                                                                                                                                                                                                                                     | <input type="checkbox"/> |
| 19. Threads guidewire through the hollow-bore needle <ul style="list-style-type: none"> <li>• The guidewire should be inserted at least several centimeters beyond the tip of the needle</li> <li>• If resistance to guidewire insertion is encountered, stops and reconfirms placement of needle</li> </ul>                                                                                                                                    | <input type="checkbox"/> |
| 20. While continuously holding guidewire, removes hollow-bore needle                                                                                                                                                                                                                                                                                                                                                                            | <input type="checkbox"/> |
| 21. While continuously holding guidewire, inserts dilator over guidewire <ul style="list-style-type: none"> <li>• The appropriate depth of dilator placement may be determined using the previously noted depth in Step 15 and/or when an abrupt loss of resistance (i.e., “give”) is felt</li> <li>• Subsequently, using small back and forth movement (racking) of the guidewire, confirms that it is freely moving and not kinked</li> </ul> | <input type="checkbox"/> |
| 22. While continuously holding guidewire, removes dilator                                                                                                                                                                                                                                                                                                                                                                                       | <input type="checkbox"/> |
| 23. While continuously holding guidewire, inserts pigtail catheter (with internal stiffener in place) over the guidewire, stopping if any resistance is noticed. <ul style="list-style-type: none"> <li>• Keeps advancing until the tip is inside the pleura, then advances only the pigtail and not the internal stiffener</li> </ul>                                                                                                          | <input type="checkbox"/> |
| 24. Removes the guidewire, and then, removes the internal stiffener                                                                                                                                                                                                                                                                                                                                                                             | <input type="checkbox"/> |
| 25. Attaches catheter tubing to chest drain tubing and secures tightly via twisting motion. <ul style="list-style-type: none"> <li>• Attaches chest drain to suction or leaves it on water seal as appropriate</li> <li>• Alternatively, attaches catheter tubing to a Heimlich valve</li> </ul>                                                                                                                                                | <input type="checkbox"/> |
| 26. Secures chest tube in place using either a sterile suture or alternate device                                                                                                                                                                                                                                                                                                                                                               | <input type="checkbox"/> |
| 27. Obtains fluid for diagnostic workup if indicated, using the side/flushing port and a syringe (e.g., 60cc syringe)                                                                                                                                                                                                                                                                                                                           | <input type="checkbox"/> |
| 28. Places a dressing at the catheter entry site                                                                                                                                                                                                                                                                                                                                                                                                | <input type="checkbox"/> |
| 29. Cleans up <ul style="list-style-type: none"> <li>• Disposes of sharps appropriately</li> </ul>                                                                                                                                                                                                                                                                                                                                              | <input type="checkbox"/> |
| 30. Writes procedure note                                                                                                                                                                                                                                                                                                                                                                                                                       | <input type="checkbox"/> |
| 31. Confirms appropriate catheter positioning via chest imaging                                                                                                                                                                                                                                                                                                                                                                                 | <input type="checkbox"/> |
